# Supplementary material
Source: PubMed Central journal article supplement (PMC2749086)
Supplement: NIHMS112302-supplement-3.pdf [file NIHMS112302-supplement-3.pdf]

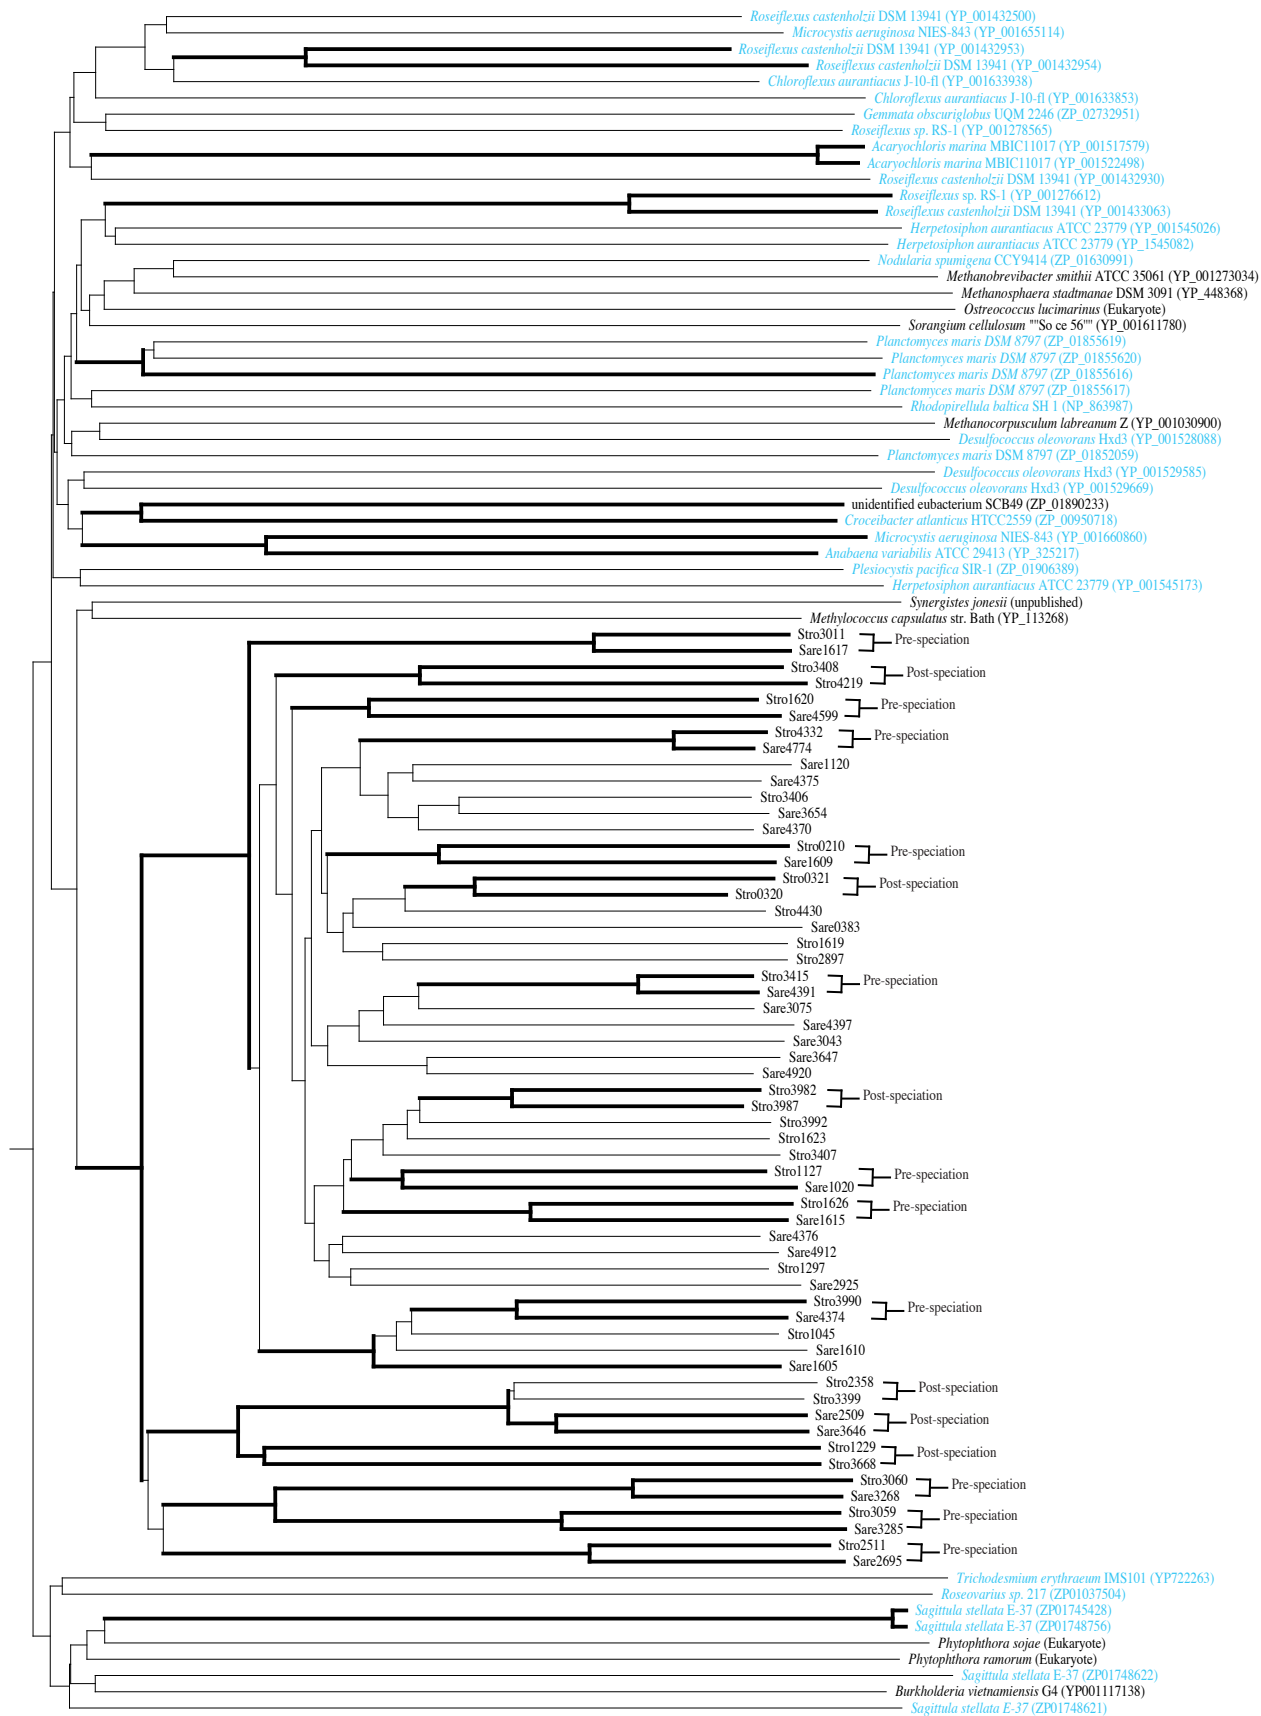

**Supplemental Figure 3.** Polymorphic Membrane Protein (PMP) phylogeny. Neighbor-joining distance tree constructed in APIS (Badger et al 2005) using the aligned amino acid sequences of SA and ST PMPs as well as those observed in other genomes. Bold lines indicate boot-strap values >50% and blue indicates strains other than SA (Sare) and ST (Stro) that were derived from aquatic environments. Accession numbers in parentheses. Post-speciation gene duplication events are labelled when paralogs from the same genome clade together while pre-speciation events are labelled when paralogs from different genomes clade together.
