# Supplementary material
Source: PubMed Central journal article supplement (PMC2749086)
Supplement: NIHMS112302-supplement-5.pdf [file NIHMS112302-supplement-5.pdf]

**Supplemental Table 2.** *S. tropica* mobile genetic elements (MGEs)

| MGE             | Gene start | Gene stop | No. genes | Island | MGE               | Gene start | Gene stop | No. genes | Island |
|-----------------|------------|-----------|-----------|--------|-------------------|------------|-----------|-----------|--------|
| AICE1           | 58         | 74        | 17        | 1      | IS701             | 2752       | 2753      | 2         | 15     |
| Phage integrase | 505        | 505       | 1         | 4      | IS630             | 2845       | 2846      | 2         | 15     |
| Prophage 1      | 507        | 559       | 53        | 4      | IS110             | 2861       | 2861      | 1         | 15     |
| IS1380          | 570        | 570       | 1         | 4      | IS630             | 2891       | 2891      | 1         | 15     |
| IS256           | 586        | 587       | 2         | 4      | unk IS            | 2899       | 2899      | 1         | 15     |
| ISNCY           | 608        | 608       | 1         | 4      | Unknown MGE       | 2908       | 2909      | 2         | 15     |
| ISNCY           | 609        | 609       | 1         | 4      | IS5               | 2941       | 2941      | 1         | 16     |
| IS3             | 648        | 648       | 1         | 4      | Phage gene        | 3417       | 3417      | 1         | 17     |
| Unknown MGE     | 988        | 994       | 7         | 5      | Prophage 3        | 3986       | 4017      | 32        | 18     |
| IS1380          | 1014       | 1014      | 1         | 5      | IS630             | 4122       | 4123      | 2         | 20     |
| IS3             | 1164       | 1165      | 2         | 6      | Tn3               | 4134       | 4134      | 1         | 20     |
| IS5             | 1315       | 1315      | 1         | 7      | Tn3               | 4137       | 4137      | 1         | 20     |
| phage gene      | 1317       | 1317      | 1         | 7      | ISL3              | 4138       | 4138      | 1         | 20     |
| IS701           | 1506       | 1518      | 13        | 8      | Rev transcriptase | 4139       | 4139      | 1         | 20     |
| Unknown MGE     | 1602       | 1609      | 8         | 9      | IS5               | 4140       | 4140      | 1         | 20     |
| IS5             | 1614       | 1614      | 1         | 9      | IS3               | 4141       | 4141      | 1         | 20     |
| Prophage 2      | 1931       | 1957      | 27        | 10     | transposase       | 4142       | 4142      | 1         | 20     |
| Phage gene      | 1980       | 1980      | 1         | 10     | IS5               | 4179       | 4179      | 1         | 20     |
| Phage gene      | 1983       | 1983      | 1         | 10     | IS30              | 368        | 368       | 1         | NI     |
| Phage gene      | 2002       | 2002      | 1         | 10     | Unknown MGE       | 749        | 756       | 8         | NI     |
| Phage gene      | 2013       | 2013      | 1         | 10     | IS66              | 1556       | 1556      | 1         | NI     |
| IS630           | 2021       | 2022      | 2         | 10     | IS110             | 1662       | 1662      | 1         | NI     |
| Tn3             | 2304       | 2304      | 1         | 12     | Phage gene        | 2334       | 2334      | 1         | NI     |
| IS110           | 2305       | 2305      | 1         | 12     | Phage gene        | 2347       | 2347      | 1         | NI     |
| Tn3             | 2369       | 2369      | 1         | 13     | IS3               | 3350       | 3351      | 2         | NI     |
| IS110           | 2466       | 2466      | 1         | 14     | Phage gene        | 3352       | 3352      | 1         | NI     |
| IS5             | 2661       | 2661      | 1         | 15     | IS5               | 3501       | 3506      | 6         | NI     |
| IS1380          | 2716       | 2717      | 2         | 15     | IS630             | 3656       | 3662      | 7         | NI     |
| IS630           | 2729       | 2730      | 2         | 15     | Total             |            |           | 153       |        |

NI: non-island.
