# Supplementary material
Source: PubMed Central journal article supplement (PMC2749086)
Supplement: NIHMS112302-supplement-6.pdf [file NIHMS112302-supplement-6.pdf]

**Supplemental Table 3.** *S. arenicola* mobile genetic elements (MGEs)

| MGE          | Gene start | Gene stop | No. genes | Island | MGE         | Gene start | Gene stop | No. genes | Island |
|--------------|------------|-----------|-----------|--------|-------------|------------|-----------|-----------|--------|
| Tn3          | 346        | 346       | 1         | 2      | Phage gene  | 3074       | 3074      | 1         | 15     |
| Recombinase  | 612        | 612       | 1         | 4      | Recombinase | 3094       | 3094      | 1         | 15     |
| Plasmid      | 925        | 958       | 34        | 5      | IS4         | 3105       | 3105      | 1         | 15     |
| IS21         | 1024       | 1025      | 2         | 6      | IS4         | 3106       | 3106      | 1         | 15     |
| ICE1         | 1208       | 1227      | 20        | 7      | IS630       | 3107       | 3107      | 1         | 15     |
| ICE2         | 1562       | 1580      | 19        | 9      | IS21        | 3160       | 3161      | 2         | 16     |
| IS21         | 1590       | 1591      | 2         | 9      | Prophage 1A | 3692       | 3743      | 52        | 17     |
| Phage gene   | 1612       | 1613      | 2         | 9      | Prophage 1B | 3744       | 3794      | 51        | 17     |
| IS701        | 1650       | 1650      | 1         | 10     | IS5         | 4558       | 4558      | 1         | 20     |
| IS256        | 1651       | 1651      | 1         | 10     | IS630       | 4571       | 4571      | 1         | 20     |
| ICE3         | 1922       | 1939      | 18        | 10     | IS21        | 4925       | 4926      | 2         | 21     |
| IS21         | 1968       | 1969      | 2         | 10     | Recombinase | 413        | 413       | 1         | NI     |
| IS5          | 1979       | 1979      | 1         | 10     | Old Plasmid | 1501       | 1502      | 2         | NI     |
| IS3          | 1991       | 1991      | 1         | 10     | IS630       | 1649       | 1649      | 1         | NI     |
| IS5          | 1998       | 1998      | 1         | 10     | Recombinase | 1915       | 1915      | 1         | NI     |
| Recombinase  | 2051       | 2051      | 1         | 10     | IS630       | 2285       | 2285      | 1         | NI     |
| Unknown MGE  | 2456       | 2477      | 22        | 12     | Recombinase | 2492       | 2492      | 1         | NI     |
| IS21         | 2854       | 2855      | 2         | 15     | IS21        | 2580       | 2581      | 2         | NI     |
| Phage gene   | 2857       | 2857      | 1         | 15     | IS630       | 3178       | 3178      | 1         | NI     |
| Plasmid gene | 2979       | 2979      | 1         | 15     | IS630       | 3576       | 3576      | 1         | NI     |
| IS110        | 2982       | 2982      | 1         | 15     | IS          | 4038       | 4038      | 1         | NI     |
| IS5          | 3023       | 3023      | 1         | 15     | ISL3        | 4192       | 4192      | 1         | NI     |
| IS4          | 3041       | 3041      | 1         | 15     | Phage gene  | 4977       | 4977      | 1         | NI     |
|              |            |           |           |        |             |            |           | Total     | 128    |

NI: non-island.
